# Supplementary material for: A Simple, Cost-Effective, and Robust Method for rRNA Depletion in RNA-Sequencing Studies
Source: PubMed Central journal article supplement (PMC7175087; doi:10.1128/mbio.00010-20), 2020-04-21
Supplement: mBio.00010-20-st001.pdf [file mBio.00010-20-st001.pdf]

Table S1 - Sequences of oligonucleotides for bacterial rRNA depletion and qRT-PCR

| <u>Name</u> | <u>Sequence</u>                          |
|-------------|------------------------------------------|
| 23S_1       | ACCTTTCCCTCACGGTACTGGTTCGCTATCGGTCA      |
| 23S_2       | AGTCGCTGGCTCATTATACAAAAGGTACGCCGTCACC    |
| 23S_3       | TCGGGGAGAACCAGCTATCTCCGGGTTTGATTGGC      |
| 23S_4       | GTGGCTGCTTCTAAGCCAACATCCTG               |
| 23S_5       | GGGTACAGGAATATTAACCTGATTTCCATCGACTACGCC  |
| 23S_6       | CACCTGTGTCGGTTTGGGGTACGGT                |
| 23S_7       | TCGTGCGGGTCGGAACCTTACCCGACAAG            |
| 23S_8       | GAGCCGACATCGAGGTGCCAAACA                 |
| 23S_9       | CGGCGGATAGGGACCGAACTGTCTCACGAC           |
| 16S_1       | CCGCTCGACTTGCATGTGTTAAGCATGCCGACAGCGTTCG |
| 16S_2       | CCCATTGTGCAAGATTCCCTACTGCTGCCTCCCGT      |
| 16S_3       | ACCGCGGCTGCTGGCACGGAGT                   |
| 16S_4       | ACGGCGTGGACTACCAGGGTAT                   |
| 16S_5       | TCCACATGCTCCACCGCTTGTGCGGGCCCCCG         |
| 16S_6       | ACCCAACATCTCACAACACGAGCTGACGACA          |
| 16S_7       | GGGCAGTGTGTACAAGGCCCGGGA                 |
| 16S_8       | AAGGAGGTGATCCAGCCGCAG                    |
| 23S_GN1     | CACGTCCTTCATCGCCTTTTACTGCCAAGGCATCC      |
| 23S_GN2     | CCACACCCGGCCTATCAACGTGGTGGTCTTCGACG      |
| 23S_GP1     | ATGCCAAGGCATCCACCATGCGCCCT               |
| 23S_GP2     | TATCCTGTCCGCACGTGGCTACCCAGCG             |
| 5S_EcPa_1   | GTTTCGGGAAGGGGTCAAGTGGGTCCAACGCGCTA      |
| 5S_EcPa_2   | AGACCCACACTACCATCGGGCATAACGTCG           |
| 5S_Sa_1     | GCATGGGAACAGGTGTGACCTCCTTGCTAT           |
| 5S_Sa_2     | GCGGAACGTAAGTTCGACTACCATCGACGCT          |
| 5S_Bs_1     | GGTATGGGAACGGGTGTGACCTCTTCGCTA           |
| 5S_Bs_2     | CGACTACCATCGGGCCTGAAGAGCTTAAC            |
| 5S_Cc_1     | CCGAGTTCGGAATGGGATCGGGTGGG               |
| 5S_Cc_2     | CTTGAGACGAAGTACCATTGGCCCAGGG             |
| 5S_Rp_1     | GGATGGGATCGTGTGTTTCACTCATGCTATAACCACC    |
| 5S_Rp_2     | TCCCATGCCTTATGACATAGTACCATTAGCGCTAT      |
| 5S_MtbMs_1  | ACCGGGCGTTTCCCTGCCGCTA                   |
| 5S_MtbMs_2  | GGTAGTATCATCGGGCCTGGCAGG                 |
| rplJ_PCR_F  | TCGCGAAGCTGGCGTAT                        |
| rplJ_PCR_R  | ATCAGGGTCGGACCAACAAA                     |
| 16S_PCR_F   | CCATGGGAGTGGGTTGC                        |
| 16S_PCR_R   | CAGTCATGAATCACAAAGTGGTAAG                |
| 23S_PCR_F   | ATCACTGGTGTTCGGGTTGT                     |
| 23S_PCR_R   | TCAACGTCGTCGTCTTCAAC                     |
